# Supplementary material for: Evidence of Age Estimation Procedures in Forensic Dentistry: Results from an Umbrella Review
Source: MDPI journal article supplement (doi:10.3390/medicina60010042), 2023-12-25
Supplement: s1 [file s1]

Supplementary File 2. Detailed list of excluded articles with reasons.

| #  | Author             | Title                                                                                                                                                              | Reference                                                                                                                         | Reason for exclusion            |
|----|--------------------|--------------------------------------------------------------------------------------------------------------------------------------------------------------------|-----------------------------------------------------------------------------------------------------------------------------------|---------------------------------|
| 1  | Capitaneanu et al. | A systematic review of odontological sex estimation methods                                                                                                        | J Forensic Odontostomatol. 2017 Dec 1;35(2):1-19.                                                                                 | No age estimation               |
| 2  | Matsuda et al.     | Forensic odontology with digital technologies: A systematic review                                                                                                 | J Forensic Leg Med . 2020 Aug;74:102004. doi: 10.1016/j.jflm.2020.102004. Epub 2020 Jul 1.                                        | No age estimation               |
| 3  | Perinetti et al.   | The diagnostic performance of dental maturity for identification of the circumpubertal growth phases: a meta-analysis                                              | Prog Orthod. 2013 May 23;14:8. doi: 10.1186/2196-1042-14-8.                                                                       | No age estimation               |
| 4  | Dallora et al.     | Bone age assessment with various machine learning techniques: A systematic literature review and meta-analysis                                                     | PLoS ONE 14(7): e0220242. <a href="https://doi.org/10.1371/journal.pone.0220242">https://doi.org/10.1371/journal.pone.0220242</a> | No dental methods evaluated     |
| 5  | Birchler et al.    | Dental age assessment on panoramic radiographs in a Swiss population: a validation study of two prediction models                                                  | Dentomaxillofac Radiol 2016; 45: 20150137.                                                                                        | Not a systematic review         |
| 6  | Birchler et al.    | Dental age assessment on panoramic radiographs: Comparison between two generations of young Finnish subjects                                                       | Journal of International Medical Research 2019, Vol. 47(1) 311–324                                                                | Not a systematic review         |
| 7  | Chudasama et al.   | Dental age assessment (DAA): A study of a Caucasian population at the 13 year threshold                                                                            | Journal of Forensic and Legal Medicine 19 (2012) 22-28                                                                            | Not a systematic review         |
| 8  | De Donno et al.    | Dental age estimation: Demirjian's versus the other methods in different populations. A literature review                                                          | Medicine, Science and the Law 2021, Vol. 61(1S) 125–129                                                                           | Not a systematic review         |
| 9  | Jayaraman et al.   | Dental age assessment of southern Chinese using the United Kingdom Caucasian reference dataset                                                                     | Forensic Sci Int. 2012 Mar 10;216(1-3):68-72. doi: 10.1016/j.forsciint.2011.08.019. Epub 2011 Sep 25.                             | Not a systematic review         |
| 10 | Jayaraman et al.   | Development of a Reference Data Set (RDS) for dental age estimation (DAE) and testing of this with a separate Validation Set (VS) in a southern Chinese population | Journal of Forensic and Legal Medicine 43 (2016) 26-33                                                                            | Not a systematic review         |
| 11 | Mitchell et al.    | Dental age assessment (DAA): Reference data for British caucasians at the 16 year threshold                                                                        | Forensic Science International 189 (2009) 19–23                                                                                   | Not a systematic review         |
| 12 | Peiris et al.      | Dental Age Assessment: a comparison of 4- to 24-year-olds in the United Kingdom and an Australian population                                                       | International Journal of Paediatric Dentistry 2009; 19: 367–376                                                                   | Not a systematic review         |
| 13 | Roberts et al.     | Dental age assessment (DAA): a simple method for children and emerging adults                                                                                      | Br Dent J. 2008 Feb 23;204(4):E7; discussion 192-3. doi: 10.1038/bdj.2008.21. Epub 2008 Jan 18.                                   | Not a systematic review         |
| 14 | Wong et al.        | Northern Chinese dental ages estimated from southern Chinese reference datasets closely correlate with chronological age                                           | Heliyon. 2016 Dec; 2(12): e00216.                                                                                                 | Not a systematic review         |
| 15 | Yadava et al.      | Dental age assessment (DAA): reference data for British children at the 10-year-old threshold                                                                      | Int J Legal Med (2011) 125:651–657                                                                                                | Not a systematic review         |
| 16 | Rolseth et al.     | Demirjian's Development Stages on Wisdom Teeth for Estimation of Chronological Age: A Systematic Review                                                            | Oslo, Norway: Knowledge Centre for the Health Services at The Norwegian Institute of Public Health (NIPH); 2017 Mar 15.           | Public report not peer reviewed |
